# Supplementary material
Source: bioRxiv or medRxiv preprint supplement (https://www.biorxiv.org/highwire/filestream/40014/field_highwire_adjunct_files/0/136234-1.pdf)
Supplement: Supplementary file [file 136234-1.pdf]

## **microRNA-451a regulates colorectal cancer radiosensitivity**

Rebecca Ruhl<sup>1</sup>, Shushan Rana<sup>2</sup>, Katherine Kelley<sup>3</sup>, Cristina Espinosa-Diez<sup>1</sup>, Clayton Hudson<sup>1</sup>, Christian Lanciault<sup>4</sup>, Liana V Tsikitis<sup>3</sup> # and Sudarshan Anand<sup>1,2,#</sup>

<sup>1</sup>Department of Cell, Developmental & Cancer Biology,

<sup>2</sup>Department of Radiation Medicine,

<sup>3</sup>Department of Surgery,

<sup>4</sup>Department of Pathology

# Equal Contribution

3181 SW Sam Jackson Park Road, Oregon Health & Science University, Portland,  
OR 97239

Correspondence to: [anands@ohsu.edu](mailto:anands@ohsu.edu) or [tsikitis@ohsu.edu](mailto:tsikitis@ohsu.edu)

Tel: 503-494-8043 (S.A)

Supplementary Figures 1-5

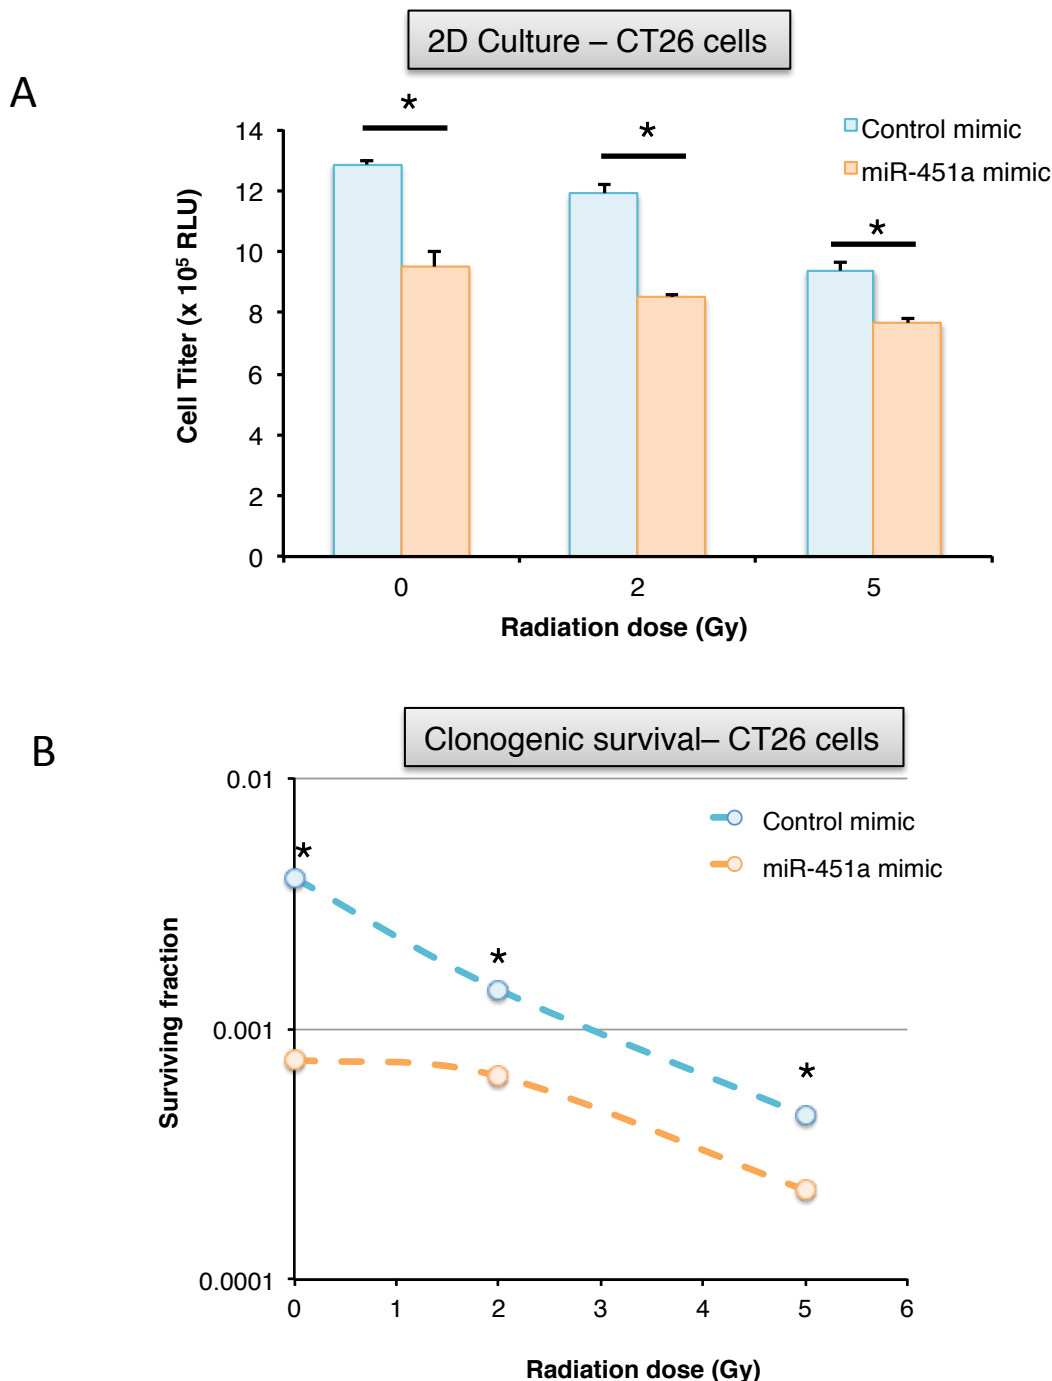

**Supplementary Figure 1. Ectopic expression of miR-451a inhibits proliferation and clonogenic survival of CT-26 cells.** CT-26 were transfected with a miR-451a mimic or a control mimic. A) Proliferation was analyzed 48 hours after radiation with the indicated doses. Bars depict mean  $\pm$  s.e.m. of triplicate wells. \* indicates  $P < 0.01$  on a two-tailed Student's T-test B) Cells were plated on 6 well plates. 12-14 days after plating, cells were fixed and stained with crystal violet and colonies were counted. Surviving fraction was calculated based on the colony numbers normalized to the plating efficiency. Mean of triplicate wells is plotted. \* $P < 0.05$  on a two-tailed Student's T-test

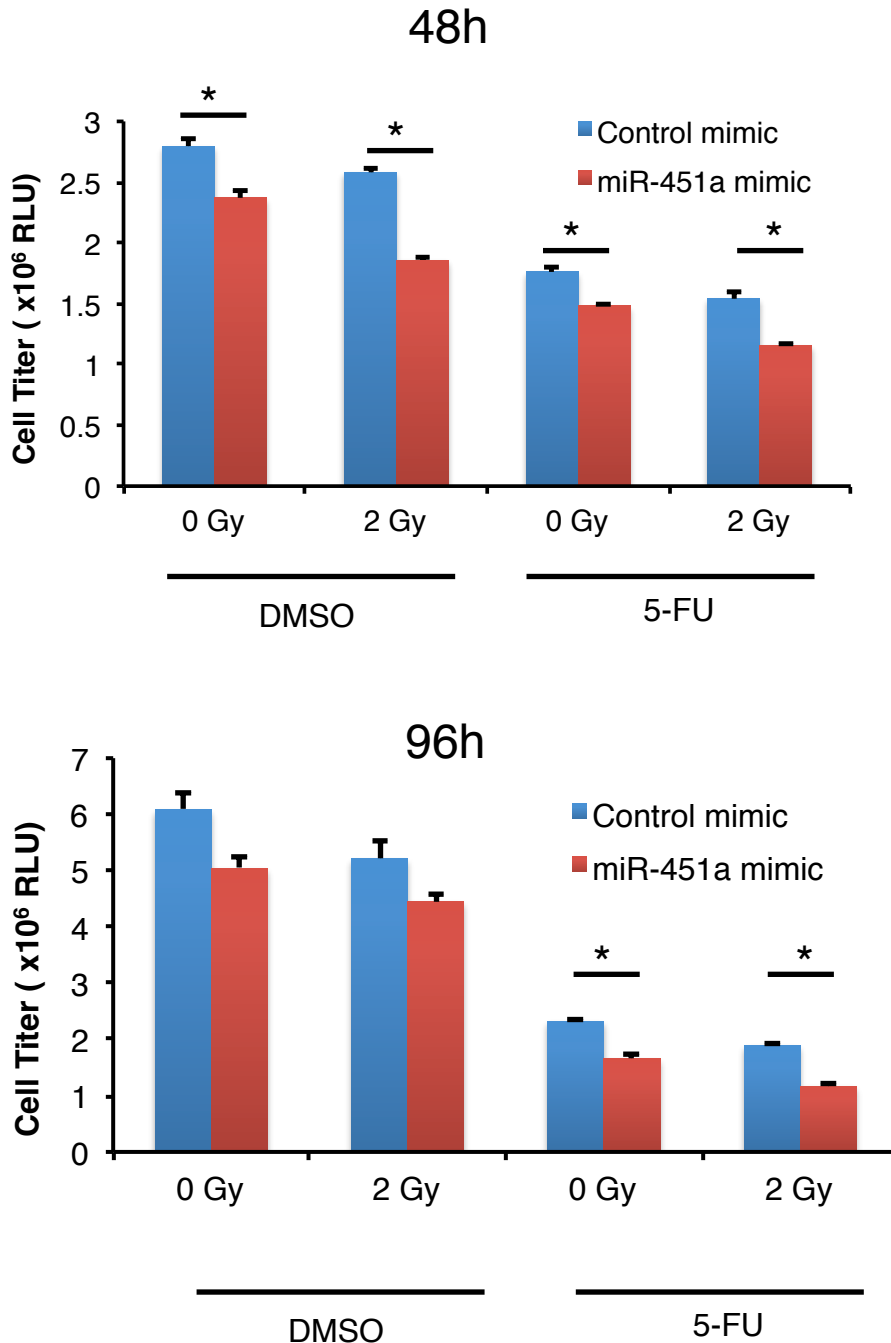

**Supplementary Figure 2. Ectopic expression of miR-451a inhibits of HCT-116 cells in combination with radiation and 5-FU.** HCT116 were transfected with a miR-451a mimic or a control mimic. Proliferation was analyzed 48 or 96 hours after radiation and 5-FU (5 $\mu$ M) treatment. Mean of triplicate wells is plotted. \* indicates  $P < 0.01$  on a two-tailed Student's T-test

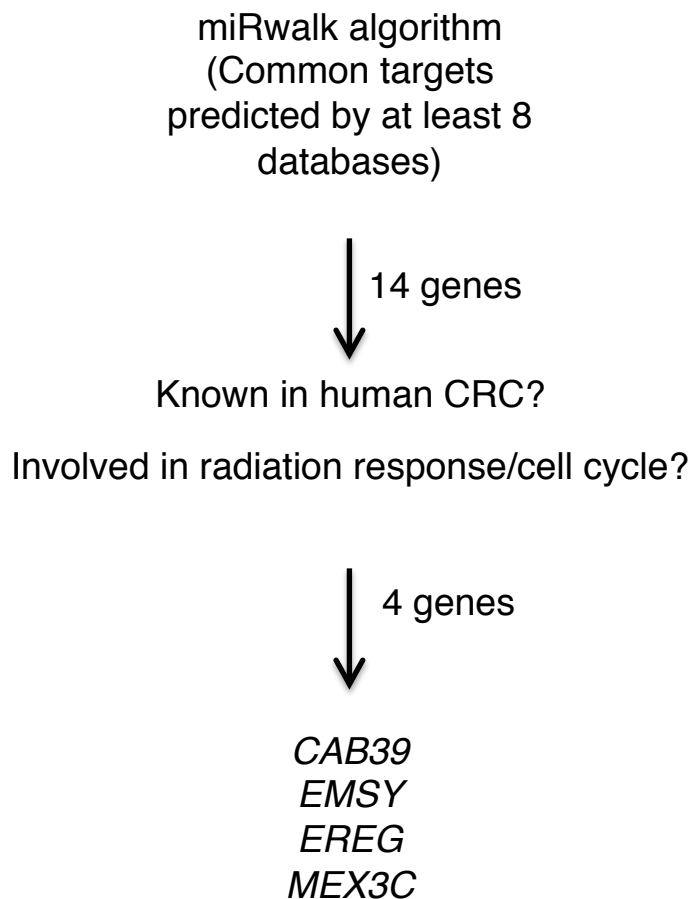

**Supplementary Figure 3. Bioinformatics approach to identify targets of miR-451a**

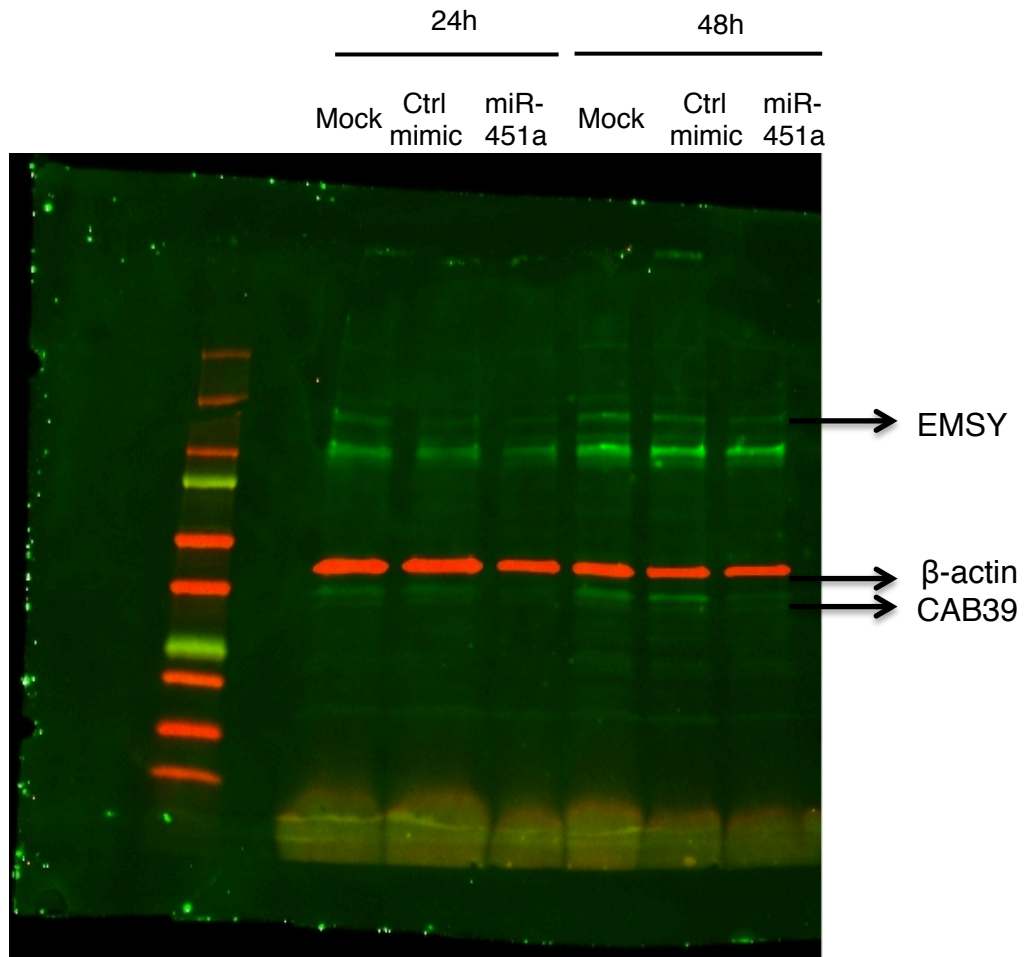

Supplementary Figure 4. Representative uncropped image of western blot in Fig 4.

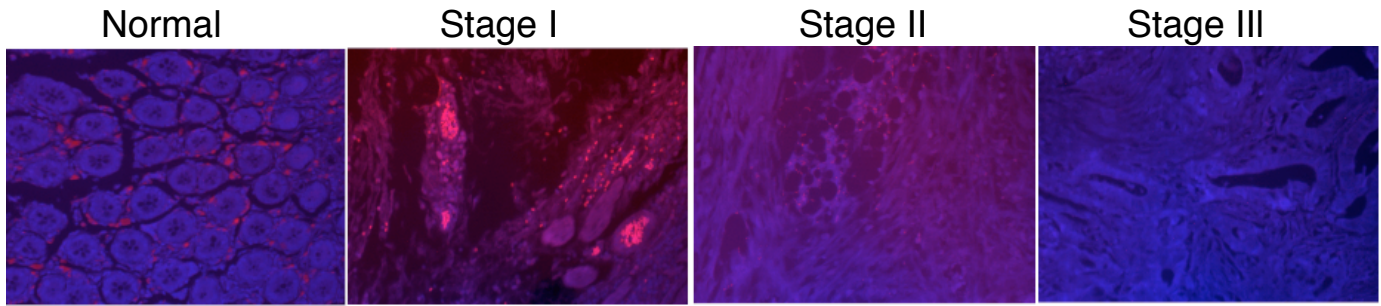

**Supplementary Figure 5. miR-451a levels in human CRC.** Representative images from a human colorectal cancer tissue array showing miR-451a (red) stained by fluorescent in situ hybridization. Nuclei stained with DAPI are shown in blue.
